# Supplementary material for: The use of antibiotic-loaded bone cement and systemic antibiotic prophylactic use in 2,971,357 primary total knee arthroplasties from 2010 to 2020: an international register-based observational study among countries in Africa, Europe, North America, and Oceania
Source: PubMed Central journal article supplement — Acta Orthop. 2023 Aug 9;94:416–25. doi: 10.2340/17453674.2023.17737 (PMC10416222; doi:10.2340/17453674.2023.17737), 2023-08-09
Supplement: ActaO-94-17737-s001.pdf [file ActaO-94-17737-s001.pdf]

## Supplementary data

Table 5. Surgical-related characteristics of TKA with ALBC by registry (2010–2020)

| Variable                         | AJRR         | AOANJRR      | DKR         | EPRD         | FAR         | JointCare | KP          | LROI         | NAR         | NJR           | NZJR        | PABZ       | PATN     | RAR         | SAR           | SIRIS        | Total          |
|----------------------------------|--------------|--------------|-------------|--------------|-------------|-----------|-------------|--------------|-------------|---------------|-------------|------------|----------|-------------|---------------|--------------|----------------|
| TKA with ALBC, n                 | 241,866      | 393,897      | 37,442      | 139,673      | 83,395      | 829       | 51,463      | 195,155      | 40,709      | 810,644       | 60,173      | 4,540      | 970      | 17,818      | 123,088       | 91,784       | 2,293,446      |
| Right side <sup>a</sup>          | 124,351 (52) | 211,123 (54) | 19,225 (51) | 72,761 (52)  | 43,564 (52) | 439 (53)  | 26,602 (52) | 103,063 (53) | 21,554 (53) | 427,167 (53)  | 31,914 (53) | 2,383 (53) | 527 (54) | 9,329 (52)  | 64,311 (52)   | 48,359 (53)  | 1,206,672 (52) |
| Fixation <sup>b</sup>            |              |              |             |              |             |           |             |              |             |               |             |            |          |             |               |              |                |
| Both/all cemented                | 232,921 (96) | 280,082 (71) | 26,327 (70) | 131,087 (94) | 82,676 (99) | 606 (73)  | 50,960 (99) | 186,530 (96) | 33,614 (83) | 806,902 (100) | 58,546 (97) | 4,352 (96) | 944 (97) | 17,818 (99) | 122,615 (100) | 73,815 (80)  | 2,109,795 (94) |
| Hybrid (tibia cemented)          | 6,086 (2.5)  | 91,538 (23)  | 11,033 (30) | 8,564 (6.1)  | 105 (0.1)   | 223 (27)  | 156 (0.3)   | 8,548 (4.4)  | 7,042 (17)  | 3,224 (0.4)   | 1,498 (2.5) | 172 (3.8)  | 22 (2.3) |             | 101 (0.1)     | 16,905 (18)  | 155,217 (6.8)  |
| Hybrid (tibia cementless)        | 1,199 (0.5)  | 2,943 (0.7)  | 92 (0.2)    | 22 (0.02)    | 402 (0.5)   |           | 22 (0.04)   | 77 (0.04)    | 53 (0.1)    | 518 (0.1)     | 129 (0.2)   | 16 (0.4)   | 4 (0.4)  |             | 213 (0.2)     | 574 (0.6)    | 6,264 (0.3)    |
| Cemented patella only            | 1,660 (0.7)  | 19,334 (4.9) |             | 21 (0.0)     |             |           | 126 (0.2)   |              |             |               |             |            |          |             | 96 (0.1)      | 21,526 (1.0) |                |
| Patella resurfacing <sup>c</sup> | na           | 266,143 (68) | 31,934 (85) | 15,233 (11)  | 9,622 (12)  | 201 (24)  | 50,922 (99) | 40,616 (21)  | 2,134 (5.2) | 324,484 (40)  | 28,017 (47) | 16 (0.4)   | 82 (8)   | 4,209 (24)  | 3,380 (2.7)   | 26,751 (29)  | 803,744 (35)   |
| Bearing mobility                 |              |              | na          |              | na          |           |             |              |             |               | na          | na         | na       |             |               |              |                |
| Fixed                            | 211,195 (88) | 344,392 (87) |             | 119,496 (86) |             | 684 (83)  | 48,423 (94) | 170,276 (87) | 31,127 (77) | 638,303 (79)  |             |            |          | 15,254 (86) | 122,729 (100) | 43,316 (47)  | 1,634,941 (72) |
| Mobile                           | 28,959 (12)  | 49,422 (13)  |             | 20,177 (14)  |             | 145 (17)  | 1334 (2.6)  | 22,618 (12)  | 9,582 (23)  | 35,124 (4.3)  |             |            |          | 2,311 (13)  | 374 (0.3)     | 28,015 (31)  | 308,300 (14)   |
| Missing                          | 1,712 (0.7)  | 83 (0.0)     |             |              |             |           | 1,706 (3.3) | 2,261 (1.2)  |             | 137,217 (17)  |             |            |          | 253 (1.4)   | 26 (0.0)      | 20,453 (22)  | 163,685 (7.2)  |
| Stability                        | na           |              |             |              | na          |           |             |              |             |               |             |            | na       |             |               |              |                |
| Minimally stabilized             |              | 285,440 (73) | 33,735 (90) | 109,506 (79) |             | 70 (8.4)  | 20,842 (41) | 85,059 (444) | 38,711 (95) | 513,989 (63)  | 41,119 (68) | 1,923 (42) |          | 108 (0.6)   | 113,958 (93)  | 60,250 (66)  | 1,047,814 (46) |
| Posterior stabilized             |              | 108,375 (27) | 3,551 (9.5) | 27,941 (20)  |             | 507 (61)  | 30,033 (58) | 107,717 (55) | 1,979 (4.9) | 58,326 (7.2)  | 15,605 (26) | 2,118 (47) |          | 15,747 (88) | 9,125 (7.4)   | 28,545 (31)  | 409,569 (18)   |
| Other (unspecified)/missing      |              | 82 (0.0)     | 138 (0.4)   | 2,226 (1.6)  |             | 252 (30)  | 588 (1.1)   | 2,379 (1.2)  | 19 (0.0)    | 238,329 (29)  | 3,449 (5.7) | 199 (4.4)  |          | 1,963 (11)  |               | 2,989 (3.3)  | 252,512 (11)   |

Missing cases: <sup>a</sup> AJRR (n = 284); <sup>b</sup> FAR (n = 191); RAR (n = 131); SAR (n = 54); SIRIS (n = 490). <sup>c</sup> FAR (n = 51); LROI (n = 538); SIRIS (n = 65). na = not available.

Table 6. Demographic characteristics of TKA with plain bone cement by registry (2010–2020)

| Variable                 | AJRR         | AOANJRR     | DKR         | EPRD       | FAR | JointCare | KP          | LROI       | NAR | NJR        | NZJR        | PABZ | PATN     | RAR        | SAR | SIRIS     | Total        |
|--------------------------|--------------|-------------|-------------|------------|-----|-----------|-------------|------------|-----|------------|-------------|------|----------|------------|-----|-----------|--------------|
| TKA with plain cement, n | 533,831      | 20,637      | 11,935      | 2,263      | 74  | 10        | 71,955      | 3,609      | na  | 5,124      | 13,571      | 4    | 180      | 12,998     | 41  | 1,679     | 677,911      |
| Female sex <sup>a</sup>  | 320,208 (60) | 11,797 (57) | 7,320 (61)  | 1,509 (67) | 49  | 8         | 44,760 (62) | 2,328 (65) | na  | 2,947 (58) | 6,905 (51)  | 2    | 110 (61) | 9,976 (77) | 25  | 978 (58)  | 408,922 (60) |
| Age group <sup>b</sup>   |              |             |             |            |     |           |             |            |     |            |             |      |          |            |     |           |              |
| < 55                     | 44,722 (8.4) | 1,248 (6.0) | 723 (6.1)   | 122 (5.4)  | 3   |           | 4,514 (6.0) | 296 (8.2)  |     | 278 (5.4)  | 1,057 (7.8) |      | 4 (2.2)  | 590 (4.5)  | 3   | 156 (9.3) | 53,716 (7.9) |
| 55–64                    | 150,956 (28) | 5,264 (26)  | 2,643 (22)  | 471 (21)   | 19  | 1         | 20,454 (28) | 978 (27)   |     | 1,120 (22) | 3,815 (28)  |      | 31 (17)  | 3,866 (30) | 7   | 438 (26)  | 190,063 (28) |
| 65–74                    | 216,523 (41) | 8,200 (40)  | 5,148 (43)  | 718 (32)   | 27  | 2         | 29,571 (41) | 1,303 (36) |     | 1,996 (39) | 5,398 (40)  | 4    | 85 (47)  | 6,416 (49) | 14  | 627 (37)  | 276,032 (41) |
| ≥ 75                     | 121,630 (23) | 5,925 (29)  | 3,421 (29)  | 954 (42.2) | 25  | 7         | 17,416 (24) | 1,030 (29) |     | 1,730 (34) | 3,301 (24)  |      | 60 (33)  | 2,126 (16) | 17  | 458 (27)  | 158,100 (23) |
| ASA score                | na           |             | na          |            |     | na        |             |            | na  |            |             |      |          | na         |     |           |              |
| ASA I                    |              | 860 (7.5)   |             | 5 (0.2)    | 1   |           | 932 (1.3)   | 546 (15)   |     | 606 (12)   | 1,490 (11)  | 1    | 7 (3.9)  |            | 11  | 150 (8.9) | 4,609 (0.7)  |
| ASA II                   |              | 6,376 (56)  |             | 33 (1.5)   | 6   |           | 44,835 (62) | 2,518 (70) |     | 3,661 (71) | 8,496 (63)  | 3    | 62 (34)  |            | 22  | 1008 (60) | 67,020 (9.9) |
| ASA III                  |              | 4,118 (36)  |             | 30 (1.3)   | 9   |           | 24,808 (35) | 533 (15)   |     | 837 (16)   | 3,317 (24)  |      | 9 (5.0)  |            | 7   | 250 (15)  | 33,918 (5.0) |
| ASA IV–V                 |              | 135 (1.2)   |             | 1 (0.04)   |     |           | 316 (0.4)   | 8 (0.2)    |     | 20 (0.4)   | 56 (0.4)    |      |          |            | 1   | 0         | 537 (0.1)    |
| Missing                  |              | 9,148 (44)  |             | 2,201 (97) | 58  |           | 1,064 (1.5) | 4 (0.1)    |     |            | 112 (1.6)   |      | 102 (57) |            |     | 271 (16)  | 13,060 (19)  |
| BMI category             |              |             |             |            |     |           |             |            | na  |            |             | na   | na       | na         |     |           |              |
| Underweight (<18.5)      | 893 (0.3)    | 13 (0.2)    | 22 (0.2)    | 1 (0.4)    |     |           | 93 (0.1)    | 2 (0.1)    |     | 6 (0.1)    | 13 (0.1)    |      |          |            |     | 0         | 4 (0.2)      |
| Normal (18.5–<25)        | 27,874 (10)  | 751 (11)    | 1,709 (14)  | 161 (7.1)  | 1   | 1         | 8,900 (12)  | 238 (6.6)  |     | 381 (7.4)  | 979 (7.2)   |      |          |            | 11  | 285 (17)  | 41,291 (6.1) |
| Pre-obese (25–<30)       | 75,635 (28)  | 2,238 (34)  | 3,552 (30)  | 364 (16)   | 7   | 8         | 23,889 (33) | 630 (18)   |     | 1,165 (23) | 2,941 (22)  |      |          |            | 20  | 518 (31)  | 110,967 (16) |
| Obese Class 1 (30–<35)   | 78,913 (30)  | 1,978 (30)  | 2,422 (20)  | 248 (11)   | 7   | 1         | 22,423 (31) | 508 (14)   |     | 1,031 (20) | 2,805 (21)  |      |          |            | 8   | 374 (22)  | 110,718 (16) |
| Obese Class 2 (35–<40)   | 51,774 (19)  | 1,040 (16)  | 1,044 (8.8) | 116 (5.1)  |     |           | 12,372 (17) | 202 (5.6)  |     | 544 (11)   | 1,400 (10)  |      |          |            | 2   | 173 (10)  | 68,667 (10)  |
| Obese Class 3 (≥ 40)     | 33,743 (13)  | 610 (9.2)   | 381 (3.2)   | 81 (3.6)   |     |           | 4,239 (5.9) | 94 (2.6)   |     | 257 (5.0)  | 836 (6.2)   |      |          |            | 0   | 42 (2.5)  | 40,283 (5.9) |
| Missing                  | 264,999 (50) | 14,007 (68) | 2,805 (24)  | 1,292 (57) | 12  |           | 39 (0.1)    | 1,935 (54) |     | 1,740 (34) | 4,597 (34)  |      |          |            |     | 283 (17)  | 291,709 (43) |

Missing cases: <sup>a</sup> AJRR (n = 1,840); LROI (n = 3). <sup>b</sup> LROI (n = 2). c BMI categories are based on WHO classification. na = not available. NB: NAR (Norway) uses ALBC 100%.

Table 7. Surgical-related characteristics of TKA with plain bone cement by registry (2010–2020)

| Variable                          | AJRR         | AOANJRR     | DKR         | EPRD       | FAR | JointCare | KP          | LROI       | NAR | NJR        | NZJR        | PABZ | PATN     | RAR          | SAR | SIRIS      | Total        |
|-----------------------------------|--------------|-------------|-------------|------------|-----|-----------|-------------|------------|-----|------------|-------------|------|----------|--------------|-----|------------|--------------|
| Right side <sup>a</sup>           | 275,863 (52) | 11,013 (53) | 5,805 (49)  | 1,184 (52) | 42  | 7         | 37,515 (52) | 1,897 (53) | na  | 2,678 (52) | 7,112 (52)  | 3    | 104 (58) | 6,742 (52)   | 24  | 876 (52)   | 350,865 (52) |
| Fixation <sup>b</sup>             |              |             |             |            |     |           |             |            | na  |            |             |      |          |              |     |            |              |
| Both/all cemented                 | 510,279 (96) | 7,775 (38)  | 9,512 (80)  | 2,183 (97) | 69  | 10        | 68,028 (95) | 3,370 (93) | na  | 5,070 (99) | 12,763 (94) | 4    | 179 (99) | 12,998 (100) | 41  | 1,539 (92) | 633,820 (96) |
| Hybrid (tibial cemented)          | 11,954 (2.2) | 6,636 (32)  | 2,416 (20)  | 80 (3.5)   | 1   |           | 2,335 (3.2) | 239 (6.6)  |     | 52 (1.0)   | 469 (3.5)   |      |          |              | 0   | 6 (0.4)    | 24,188 (3.6) |
| Hybrid (tibial cementless)        | 3,399 (0.6)  | 121 (0.6)   | 7 (0.1)     |            |     |           | 105 (0.1)   |            |     | 2 (0.04)   | 339 (2.5)   |      | 1 (0.6)  |              | 0   | 130 (7.7)  | 4,104 (0.6)  |
| Cemented patella only             | 8,199 (1.5)  | 6,105 (30)  |             |            |     |           | 473 (0.7)   |            |     |            |             |      |          |              | 0   | 0          | 14,938 (2.1) |
| Patellar resurfacing <sup>c</sup> | na           | 14,634 (71) | 8,331 (70)  | 186 (8.2)  | 18  | 10        | 70,602 (98) | 346 (9.6)  | na  | 2,472 (48) | 5,562 (41)  | 4    | 37 (21)  | 6,256 (48)   | 2   | 535 (32)   | 108,995 (16) |
| Bearing mobility                  |              |             | na          |            | na  |           |             |            | na  |            |             | na   | na       | na           |     |            |              |
| Fixed                             | 485,758 (92) | 16,339 (79) |             | 1,163 (51) |     | 10        | 69,430 (97) | 2,973 (82) |     | 3,452 (67) |             |      |          | 12,106 (93)  | 13  | 362 (22)   | 591,606 (84) |
| Mobile                            | 43,503 (8.2) | 4,291 (21)  |             | 1,100 (49) |     |           | 1,433 (2.0) | 636 (17.6) |     | 202 (3.9)  |             |      |          | 804 (4.6)    | 28  | 86 (5.1)   | 52,083 (7.4) |
| Missing                           |              | 7 (0.0)     |             |            |     |           | 1,092 (1.5) |            |     | 1,470 (29) |             |      |          | 88 (0.7)     |     | 1,231 (73) | 3,888 (0.5)  |
| Stability                         | na           |             |             |            | na  |           |             |            | na  |            |             |      | na       |              |     |            |              |
| Minimally stabilized              |              | 17,627 (83) | 11,177 (94) | 2,004 (89) |     |           | 18,348 (26) | 2,231 (62) |     | 2,568 (50) | 8,873 (65)  | 2    |          | 371 (2.9)    | 38  | 1,476 (88) | 64,715 (9.5) |
| Posterior stabilized              |              | 3,003 (15)  | 716 (6.0)   | 251 (11)   |     | 10        | 52,894 (74) | 1,375 (38) |     | 173 (3.4)  | 4,148 (31)  | 2    |          | 11,494 (88)  | 3   | 173 (10)   | 74,246 (11)  |
| Other (unspecified)/missing       |              | 7 (0.0)     | 42 (0.4)    | 8 (0.4)    |     |           | 713 (1.0)   | 3 (0.1)    |     | 2,383 (47) | 550 (4.1)   |      |          | 1,133 (8.7)  |     | 30 (1.8)   | 4,862 (0.7)  |

Missing cases: <sup>a</sup> AJRR (n = 528). <sup>b</sup> FAR (n = 4); SIRIS (n = 4) <sup>c</sup> DAR (n = 20); LROI (n = 3).  
na = not available. NB: NAR (Norway) uses ALBC 100%.
